# Supplementary material for: Transcriptome analysis of differentiating trypanosomes reveals the existence of multiple post-transcriptional regulons
Source: PubMed Central journal article supplement (PMC2772864; doi:10.1186/1471-2164-10-495), 2009-10-26
Supplement: 1471-2164-10-495-s5.pdf [file 1471-2164-10-495-s5.pdf]

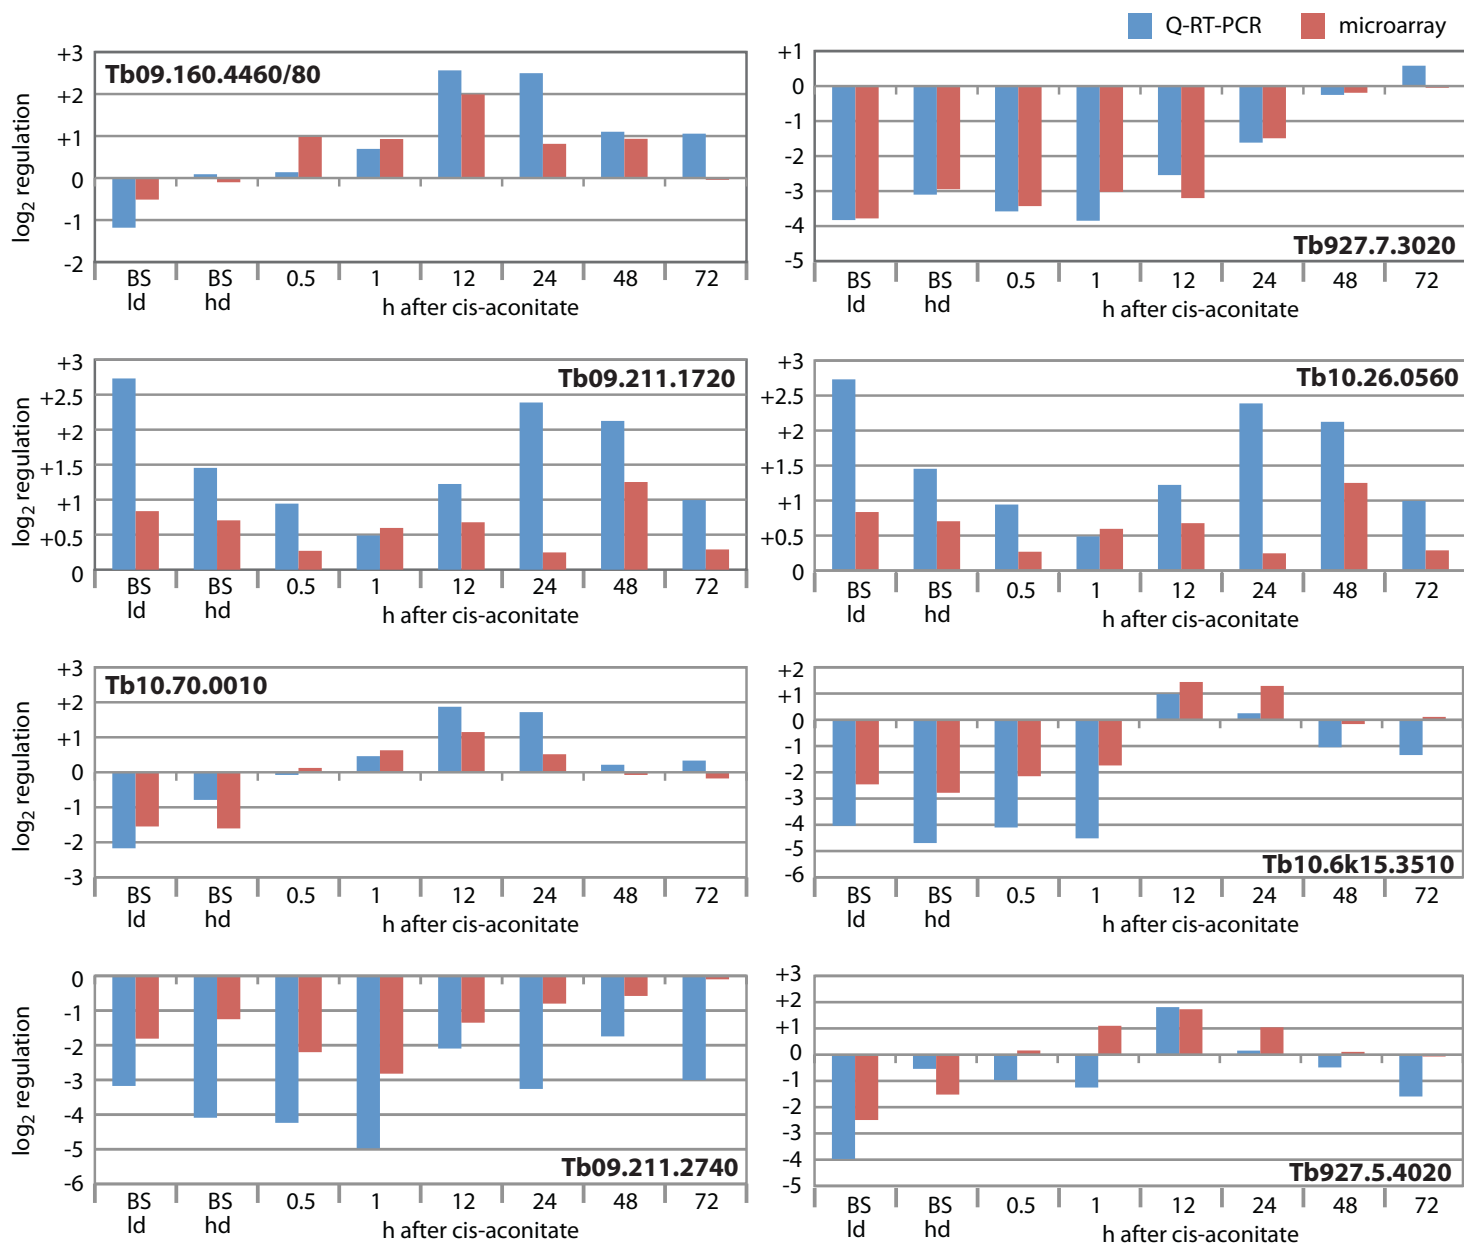

**Figure S2**

Comparison of gene expression values from microarray and quantitative rtPCR results.  $\log_2$  of normalised gene expression values from qrtPCR relative quantification and from microarray results are plotted on the charts. Gene-specific primers were designed for 21 significantly differentially regulated genes in one or more conditions using RNAit (Redmond, 2003) , to amplify a fragment of 100+/- 25 bp in each open reading frame (Tb09.160.4460/80, GAAAACCCACACTGGTGCTT / ATGTGGACGCAG-GAAGAAAC; Tb927.7.3020, TCAGCCTCAATTCCCAATC / GGGTTTCACTGTCGCCTTTA; Tb09.211.1720, TTCTACTCCTGGGACGAGTG / ATGTCTGCAAAGGGAAGACG; Tb10.26.0560, CAGCGGTGTTCTATTTCGTC / GCTTGAAGATTTTCAGGGGTG; Tb10.70.0010, ATAGCTGT-GGCGTGCCTTT / GCGCCTCCAATATTGATGAT; Tb10.6k15.3510, TCATATGCGACAACGAGGTT / TTACGGGTACGGCAAAGAT; Tb09.211.2740, TGTACATGCTGTCAAAAATGAGG / CCATAAGGGCACGTTTTCC; Tb927.5.4020, ACTTCATATTCGCACCGACC / GCGGAAGTTTACGCAGTTGT). Most of the fragments included the oligonucleotide present on the array; the exceptions were Tb09.160.4460/80 and Tb10.6k15.3510. The value for a non-regulated gene, Tb927.3.930, was used as reference for the relative quantification.
