# Supplementary material for: Transcriptome analysis of differentiating trypanosomes reveals the existence of multiple post-transcriptional regulons
Source: PubMed Central journal article supplement (PMC2772864; doi:10.1186/1471-2164-10-495), 2009-10-26
Supplement: 1471-2164-10-495-s6.pdf [file 1471-2164-10-495-s6.pdf]

**A.**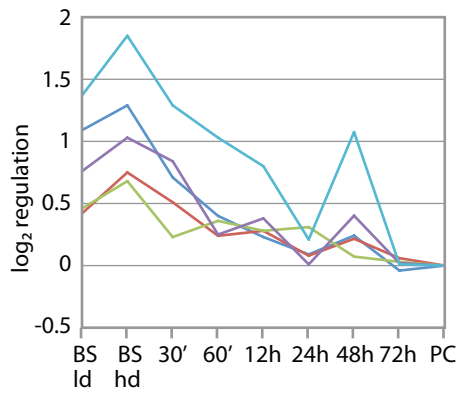

— Tb927.8.890 RAB1  
 — Tb10.6k15.2500 beta-adaptin  
 — Tb10.05.0080 glucosidase  
 — Tb927.3.4000 clathrin adaptor  
 — Tb927.3.5660 UDP-Gal or UDP-GlcNAc-dependent glycosyltransferase

**B.**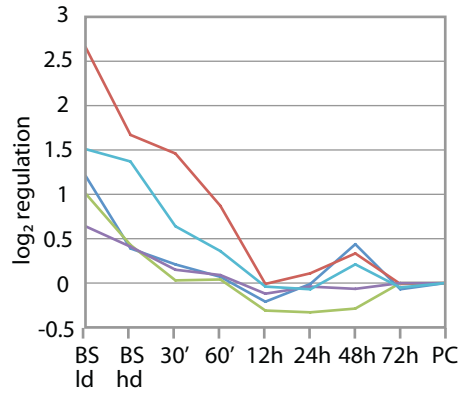

— Tb927.3.3450 ARF  
 — Tb10.6k15.2290 PDI  
 — Tb11.02.4100 SEC61-like  
 — Tb11.01.1290 14-3-3  
 — Tb10.61.1910 clathrin light chain-like

**C.**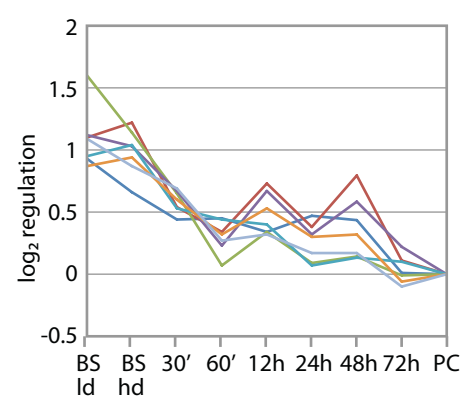

— Tb09.211.4460 ARF  
 — Tb927.6.3500 RME8  
 — Tb927.7.1300 PDI  
 — Tb927.7.3180 mu-adaptin  
 — Tb11.01.3560 vacuolar ATP synthase  
 — Tb927.5.3220 signal peptidase  
 — Tb09.211.1770 SNF7

Supplementary Figure S3: Regulation of mRNAs involved in vesicular transport. A, B, and C show three different patterns.
